# Supplementary material for: Catalytic mechanism of acetolactate decarboxylase from Brevibacillus brevis towards both enantiomers of α-acetolactate
Source: Royal Society of Chemistry journal article supplement (doi:10.1039/c6ra18264j), 2016-01-01
Supplement: c6ra18264j1.pdf [file c6ra18264j1.pdf]

## Catalytic Mechanism of Acetolactate Decarboxylase from *Brevibacillus brevis* Towards both Enantiomers of $\alpha$ -acetolactate

Chenxiao Zhao, Hao Su, Yongjun Liu\*

School of Chemistry and Chemical Engineering, Shandong University, Jinan, Shandong 250100, China

**Table S1.** Key distances in the five optimized geometries. Distances are given in angstroms.

|                      | R <sub>A</sub> | TS1 <sub>A</sub> | IM1 <sub>A</sub> | TS2 <sub>A</sub> | P <sub>A</sub> |
|----------------------|----------------|------------------|------------------|------------------|----------------|
| d <sub>Zn-N194</sub> | 2.11           | 2.14             | 2.14             | 2.13             | 2.09           |
| d <sub>Zn-N196</sub> | 2.11           | 2.11             | 2.15             | 2.13             | 2.12           |
| d <sub>Zn-N207</sub> | 2.25           | 2.17             | 2.12             | 2.12             | 2.10           |
| d <sub>Zn-OA1</sub>  | 2.06           | 2.75             | 3.56             | 5.44             | 5.33           |
| d <sub>Zn-OA2</sub>  | 2.21           | 2.22             | 2.28             | 2.22             | 2.18           |
| d <sub>Zn-OA3</sub>  | 2.39           | 1.98             | 1.92             | 2.03             | 2.14           |
| d <sub>CA2-CA3</sub> | 1.52           | 1.40             | 1.37             | 1.43             | 1.52           |

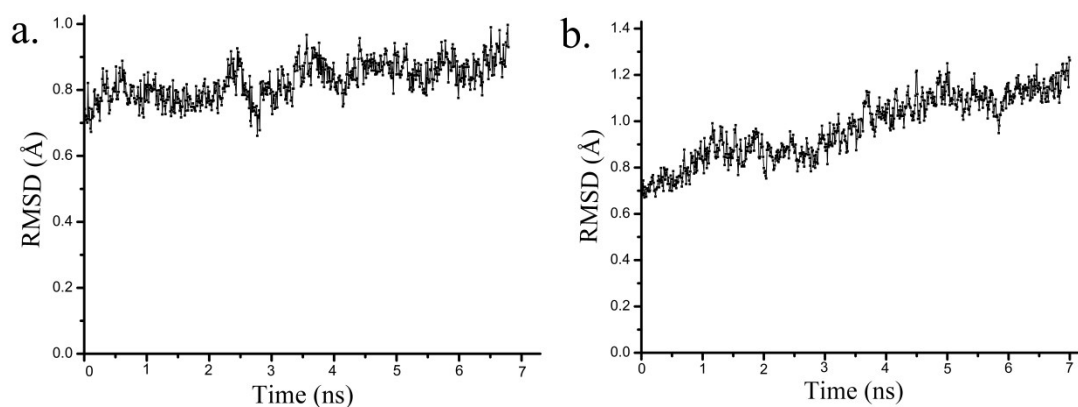

Figure S1. Time dependences of RMSDs from 7ns MD simulations for Michaelis complexes of ALDC-(S)-AL (a) and ALDC-(R)-AL (b).

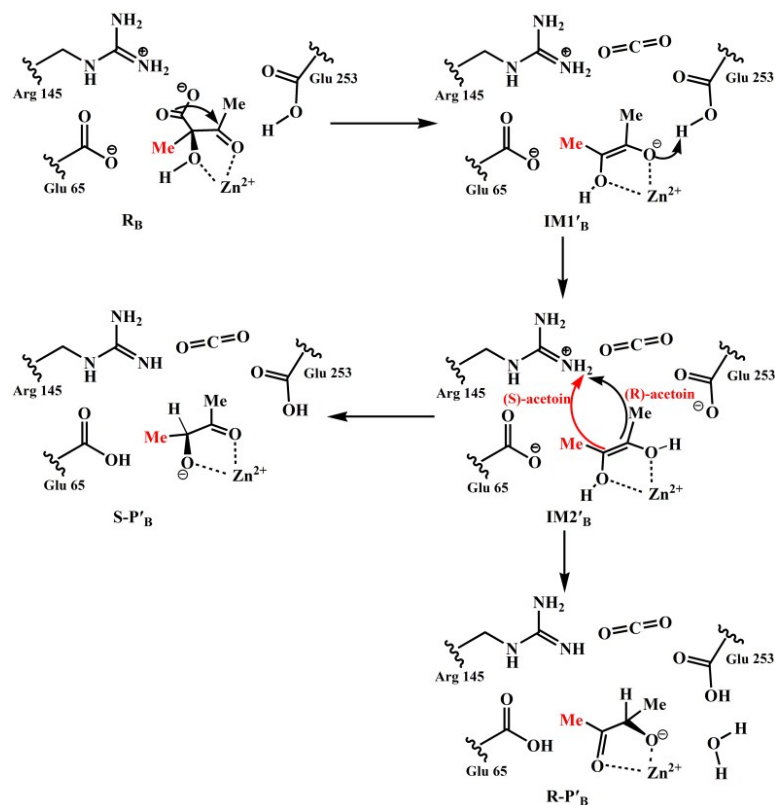

Scheme S1. Possible pathways of the conversion of (R)- $\alpha$ -acetolactate to (R)-acetoin catalyzed by ALDC, in which the (R)-AL firstly undergoes direct decarboxylation rather than carboxylate migration.

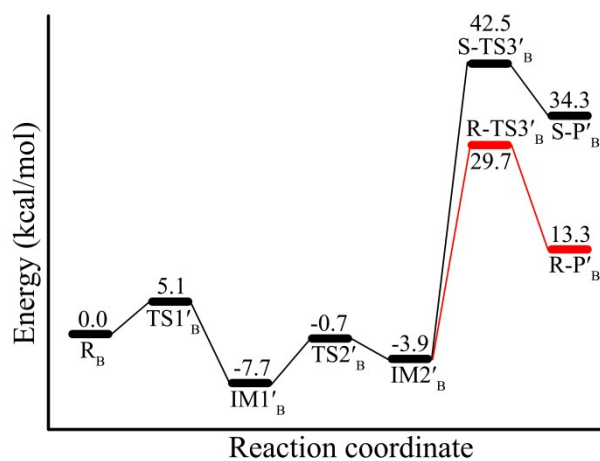

Figure S2. Energy profile for the pathways of the conversion of (R)- $\alpha$ -acetolactate to (R)-acetoin, in which the (R)-AL firstly undergoes direct decarboxylation rather than carboxylate migration. The energy data have included the dispersion corrections.

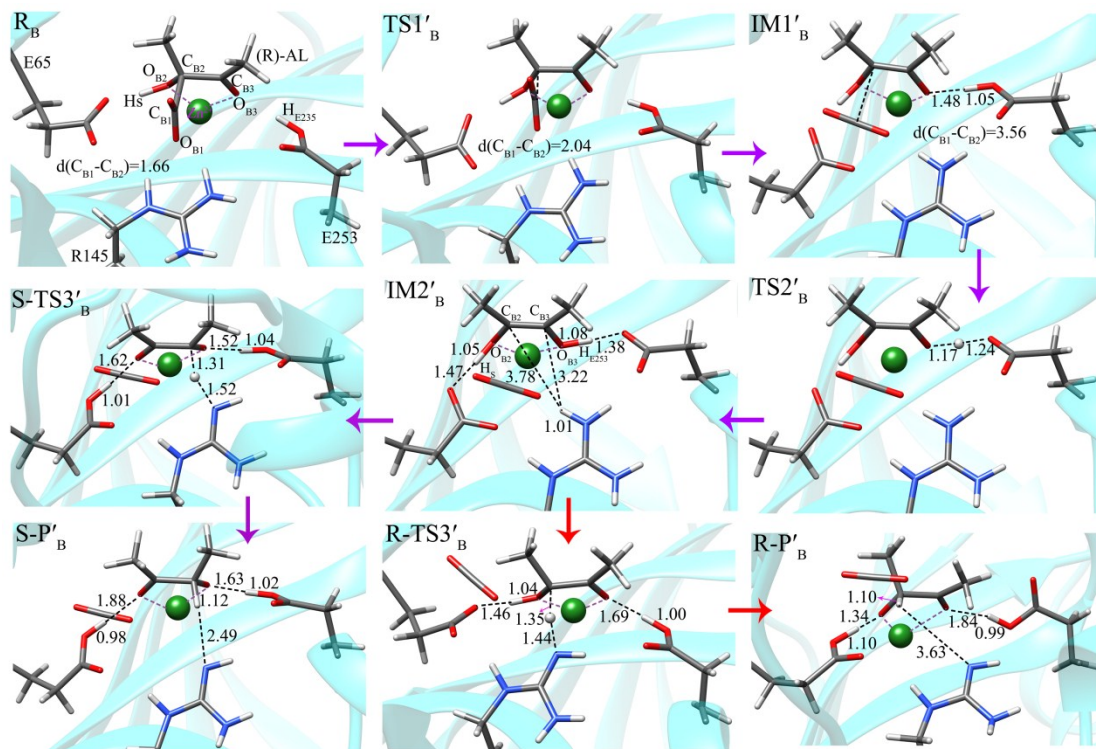

Figure S3. Optimized structures involved in the pathways of the conversion of (R)- $\alpha$ -acetolactate to (R)-acetoin, in which the (R)-AL firstly undergoes direct decarboxylation rather than carboxylate migration. All distance are given in angstroms.
